# Supplementary material for: Frequent haze events associated with transport and stagnation over the corridor between North China Plain and Yangtze River Delta
Source: Copernicus journal article supplement (doi:10.5194/egusphere-2023-1871), 2023-10-09
Supplement: Supplementary file 1 [file egusphere-2023-1871-supplement.pdf]

## Supporting Information for

### **Frequent haze events associated with transport and stagnation over the corridor between North China Plain and Yangtze River Delta**

Feifan Yan<sup>1</sup>, Hang Su<sup>2</sup>, Yafang Cheng<sup>2</sup>, Rujin Huang<sup>3</sup>, Hong Liao<sup>4</sup>, Ting Yang<sup>5</sup>, Yuanyuan Zhu<sup>6</sup>, Shaoqing Zhang<sup>7</sup>, Lifang Sheng<sup>8</sup>, Wenbing Kou<sup>1</sup>, Xinran Zeng<sup>9</sup>, Shengnan Xiang<sup>1</sup>, Xiaohong Yao<sup>1</sup>, Huiwang Gao<sup>1</sup>, Yang Gao<sup>1\*</sup>

<sup>1</sup>Frontiers Science Center for Deep Ocean Multispheres and Earth System (FDOMES) and Key Laboratory of Marine Environmental Science and Ecology, Ministry of Education, Ocean University of China, and Laoshan Laboratory, Qingdao, 266100, China

<sup>2</sup>Max Planck Institute for Chemistry, Multiphase Chemistry Department, Mainz D-55128, Germany

<sup>3</sup>State Key Laboratory of Loess and Quaternary Geology (SKLLQG), Center for Excellence in Quaternary Science and Global Change, Institute of Earth Environment, Chinese Academy of Sciences, Xi'an 710061, China

<sup>4</sup>Jiangsu Key Laboratory of Atmospheric Environment Monitoring and Pollution Control, Jiangsu Engineering Technology Research Center of Environmental Cleaning Materials, Collaborative Innovation Center of Atmospheric Environment and Equipment Technology, School of Environmental Science and Engineering, Nanjing University of Information Science & Technology, Nanjing 210044, China

<sup>5</sup>State Key Laboratory of Atmospheric Boundary Layer Physics and Atmospheric Chemistry, Institute of Atmospheric Physics, Chinese Academy of Sciences, Beijing, 100029, China

<sup>6</sup>China National Environmental Monitoring Centre, Beijing 100012, China

<sup>7</sup>Frontiers Science Center for Deep Ocean Multispheres and Earth System, and Key Laboratory of Physical Oceanography, Ministry of Education, the College of Oceanic and Atmospheric Sciences, Ocean University of China, and Laoshan Laboratory, Qingdao, 266100, China

<sup>8</sup>College of Oceanic and Atmospheric Sciences, Ocean University of China, Qingdao, 266100, China

<sup>9</sup>Zhejiang Institute of Meteorological Sciences, Hangzhou, 310008, China

\*Correspondence to: yanggao@ouc.edu.cn

## Supplemental Information

**This supplemental information includes 3 tables and 6 figures.**

### Table captions

**Table S1** Model configuration of WRF.

**Table S2** The evaluation of daily meteorological parameters, including air temperature at 2m (T2), specific humidity at 2m (Q2), wind speed (WS10) and direction (WD10) at 10m from WRF model simulation and NCDC observation.

**Table S3** The total number of the polluted days exceedance in SWLY during winters in 2014-2019.

### Figure Captions

**Fig. S1** The simulation domains of WRF (black square), CMAQ (magenta square) and the regions of NCP (red square), SWLY (green square), and YRD (blue square) used for the analysis.

**Fig. S2** Scatter plot of simulated and observational daily mean PM<sub>2.5</sub> over three regions (NCP, SWLY, and YRD) from 2014 to 2019. The linear regression is marked in red line. The statistical parameters are also shown on the top left, including mean fractional bias (MFB), mean fractional error percent (MFE), and correlation coefficient (R), with the asterisk on the top left of R indicating statistical significance ( $P < 0.05$ ).

**Fig. S3** Duration and average PM<sub>2.5</sub> concentration of pollution events which PM<sub>2.5</sub> concentration is greater than 75  $\mu\text{g m}^{-3}$  in SWLY and NCP in winter of 2014-2019.

**Fig. S4** The cumulative distribution function of observational daily PM<sub>2.5</sub> in wintertime of SWLY in 2014-2019. The grey, green and orange dotted lines implies 75, 150, and 250  $\mu\text{g m}^{-3}$  of PM<sub>2.5</sub> concentrations, respectively.

**Fig. S5** The regional mean total frequency (a) and duration (b) of observational PM<sub>2.5</sub> for three categories (I: 75-150  $\mu\text{g m}^{-3}$  II: 150-250  $\mu\text{g m}^{-3}$ , III: greater than 250  $\mu\text{g m}^{-3}$ ) over SWLY, NCP and YRD in winter during 2014-2019.

**Fig. S6** (a)-(c): Monthly average emissions of (t/month) from MEIC emission inventory in winter 2016; (d) The monthly average emissions of PM<sub>2.5</sub>, NO<sub>x</sub>, and SO<sub>2</sub> derived from MEIC in SWLY and NCP in winter 2016.

Table S1 Model configuration of WRF.

| WRF configuration                | Scheme                                                                                      |
|----------------------------------|---------------------------------------------------------------------------------------------|
| Microphysics                     | Morrison microphysics scheme (Morrison et al., 2009)                                        |
| Land surface option              | Unified Noah land surface model (Chen and Dudhia, 2001)                                     |
| Longwave and shortwave radiation | Rapid Radiation Transfer Model Global (RRTMG) (Iacono et al., 2008; Morcrette et al., 2008) |
| Cumulus parameterization scheme  | GrellFreitas cumulus parameterization scheme (Grell and Freitas, 2014)                      |
| Planetary boundary layer scheme  | YSU (Hong et al., 2006)                                                                     |

Table S2 The evaluation of daily meteorological parameters, including air temperature at 2m (T2), specific humidity at 2m (Q2), wind speed (WS10) and direction (WD10) at 10m from WRF model simulation and NCDC observation.

|             | Model evaluation |      |       |      | Benchmarks (Emery and Tai, 2001) |              |               |                |
|-------------|------------------|------|-------|------|----------------------------------|--------------|---------------|----------------|
|             | T2               | Q2   | WD10  | WS10 | T2                               | Q2           | WD10          | WS10           |
| Bias        | -0.28            | 0.01 | 0.03  | 0.85 | $\leq \pm 0.5$                   | $\leq \pm 1$ | $\leq \pm 10$ | $\leq \pm 0.5$ |
| Gross Error | 1.97             | 0.01 | 45.98 | /    | $\leq 2$                         | $\leq 2$     | $\leq 30$     | /              |
| RMSE        | /                | /    | /     | 1.62 | /                                | /            | /             | $\leq 2$       |

Table S3 The total number of the polluted days exceedance in SWLY during winters in 2014-2019.

|                    | 75-150 $\mu\text{g m}^{-3}$ | 150-250 $\mu\text{g m}^{-3}$ | greater than 250 $\mu\text{g m}^{-3}$ | total <sup>a</sup> |
|--------------------|-----------------------------|------------------------------|---------------------------------------|--------------------|
| seesaw patterns    | 98                          | 22                           | 1                                     | 121                |
| stagnation         | 105                         | 32                           | 1                                     | 138                |
| other              | 118                         | 10                           | 0                                     | 128                |
| total <sup>b</sup> | 321                         | 64                           | 2                                     | 387                |

a indicates the total number of polluted days due to seesaw patterns, stagnation days and other; b indicates the total number of days in three categories.

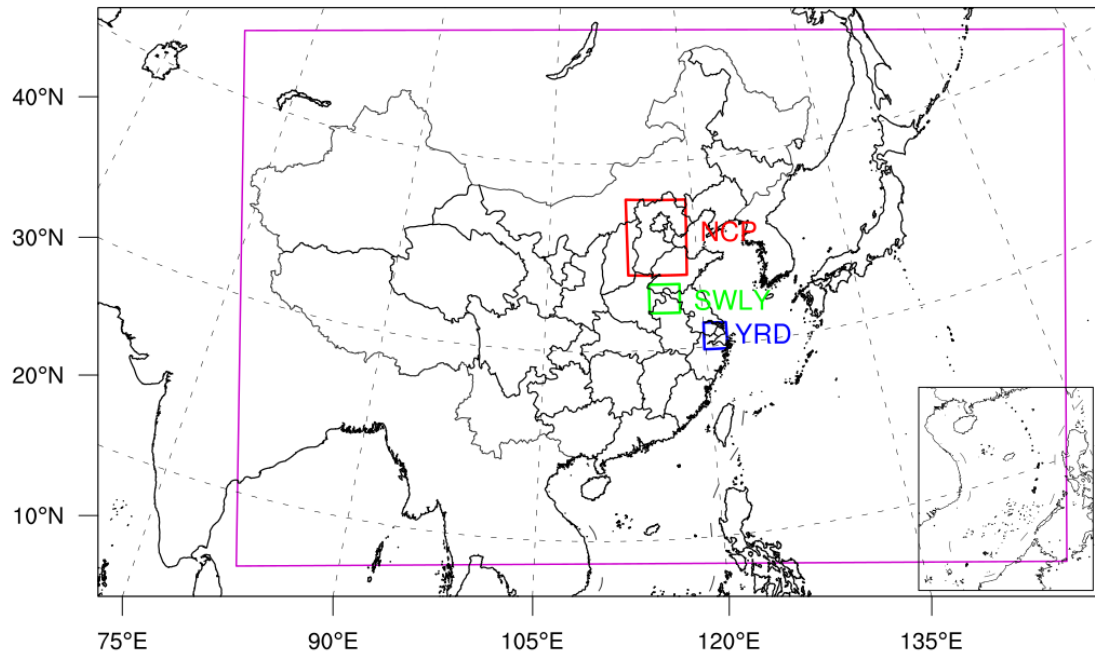

Fig. S1 The simulation domains of WRF (black square), CMAQ (magenta square) and the regions of NCP (red square), SWLY (green square), and YRD (blue square) used for the analysis.

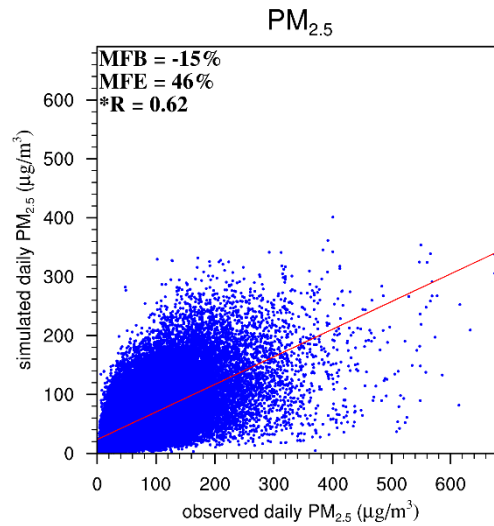

Fig. S2 Scatter plot of simulated and observational daily mean PM<sub>2.5</sub> over three regions (NCP, SWLY, and YRD) from 2014 to 2019. The linear regression is marked in red line. The statistical parameters are also shown on the top left, including mean fractional bias (MFB), mean fractional error percent (MFE), and correlation coefficient (R), with the asterisk on the top left of R indicating statistical significance ( $P < 0.05$ ).

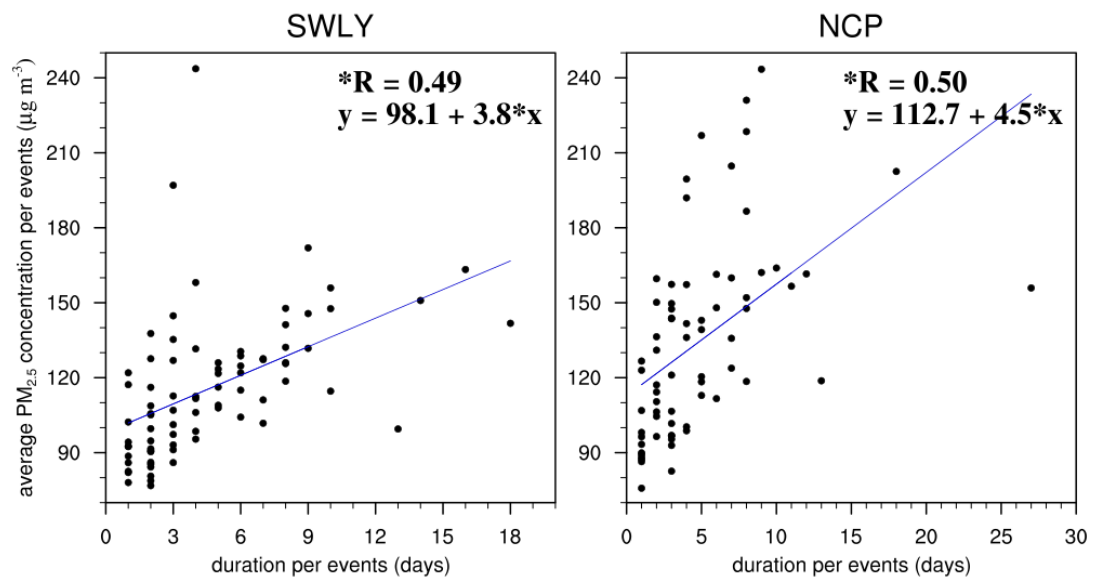

Fig. S3 Duration and average PM<sub>2.5</sub> concentration of pollution events which PM<sub>2.5</sub> concentration is greater than 75 µg m<sup>-3</sup> in SWLY and NCP in winter of 2014-2019.

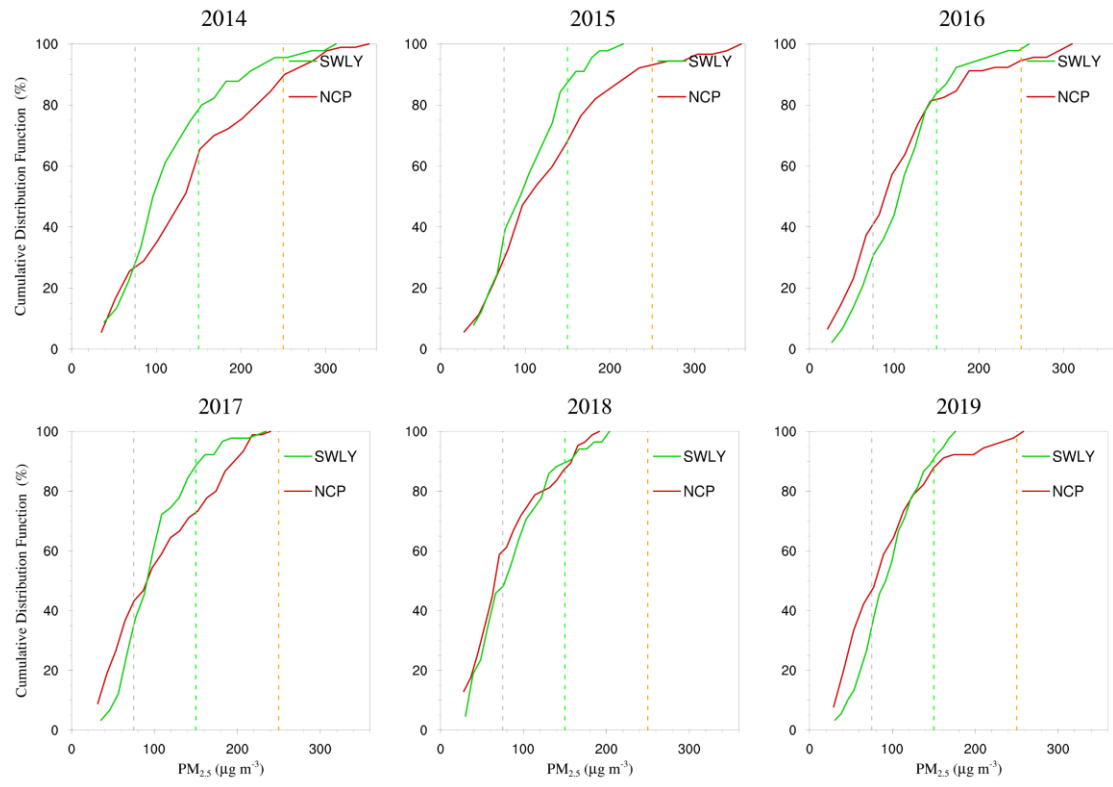

Fig. S4 The cumulative distribution function of observational daily PM<sub>2.5</sub> in wintertime of SWLY in 2014-2019. The grey, green and orange dotted lines implies 75, 150, and 250 µg m<sup>-3</sup> of PM<sub>2.5</sub> concentrations, respectively.

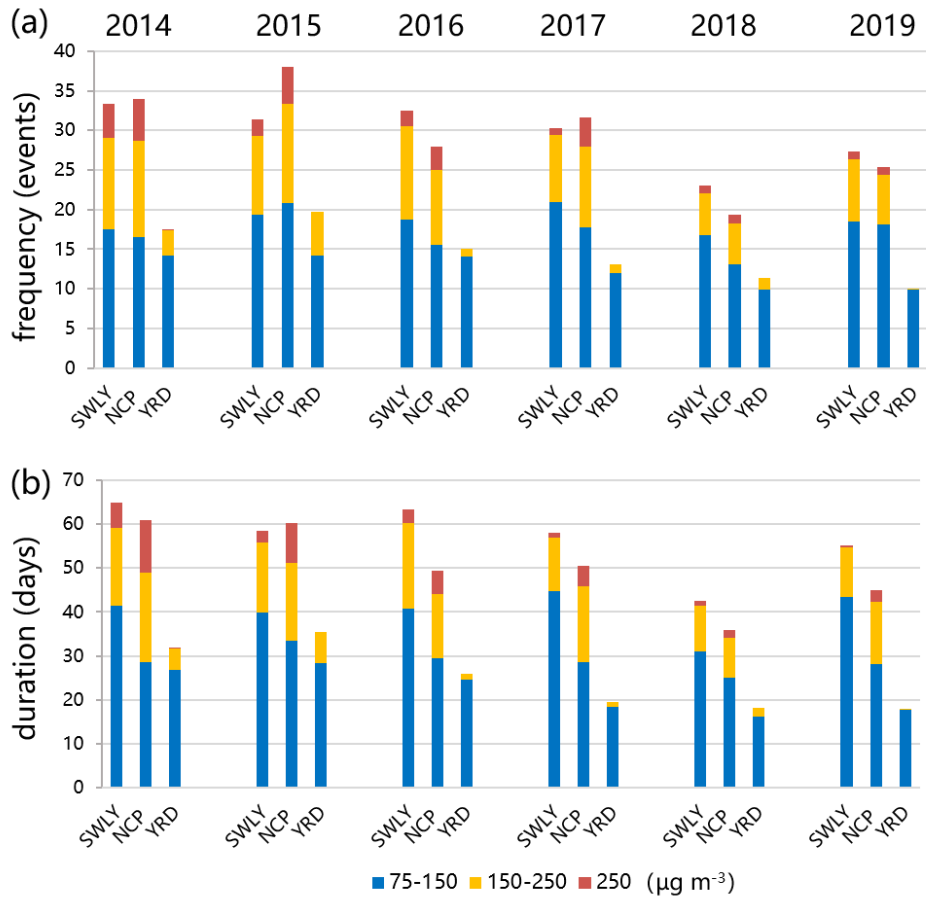

Fig. S5 The regional mean total frequency (a) and duration (b) of observational PM<sub>2.5</sub> for three categories (I: 75-150 µg m<sup>-3</sup> II: 150-250 µg m<sup>-3</sup>, III: greater than 250 µg m<sup>-3</sup>) over SWLY, NCP and YRD in winter during 2014-2019.



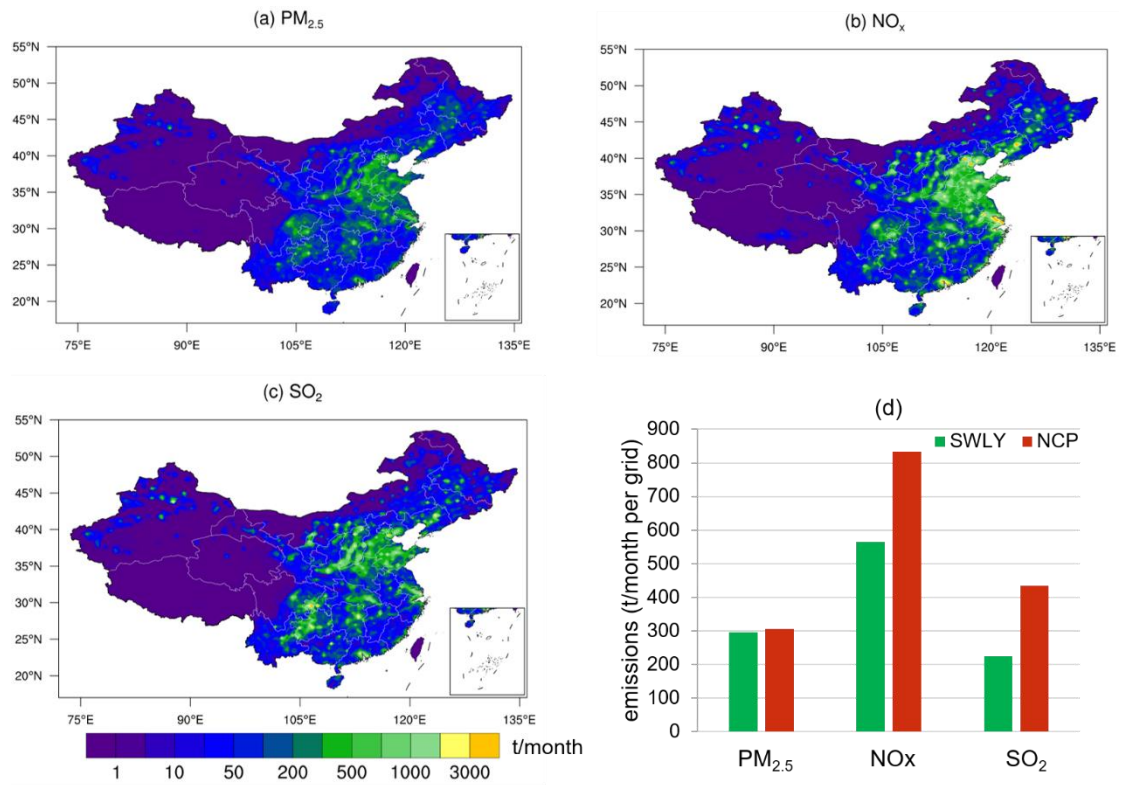

Fig. S6 (a)-(c): Monthly average emissions of (t/month) from MEIC emission inventory in winter 2016; (d) The monthly average emissions of  $PM_{2.5}$ ,  $NO_x$ , and  $SO_2$  derived from MEIC in SWLY and NCP in winter 2016.

## References

- Chen, F., Dudhia, J., 2001. Coupling an advanced land surface-hydrology model with the Penn State-NCAR MM5 modeling system. Part I: Model implementation and sensitivity. *Monthly Weather Review*. 129, 569-585.
- Emery, C., Tai, E. Enhanced Meteorological Modeling and Performance Evaluation for Two Texas Ozone Episodes, 2001.
- Grell, G.A., Freitas, S.R., 2014. A scale and aerosol aware stochastic convective parameterization for weather and air quality modeling. *Atmos. Chem. Phys.* 14, 5233-5250.
- Hong, S.Y., Noh, Y., Dudhia, J., 2006. A new vertical diffusion package with an explicit treatment of entrainment processes. *Monthly Weather Review*. 134, 2318-2341.
- Iacono, M.J., Delamere, J.S., Mlawer, E.J., Shephard, M.W., Clough, S.A., Collins, W.D., 2008. Radiative forcing by long-lived greenhouse gases: Calculations with the AER radiative transfer models. *Journal of Geophysical Research-Atmospheres*. 113.
- Morcrette, J.-J., Barker, H.W., Cole, J.N.S., Iacono, M.J., Pincus, R., 2008. Impact of a New Radiation Package, McRad, in the ECMWF Integrated Forecasting System. *Monthly Weather Review*. 136, 4773-4798.
- Morrison, H., Thompson, G., Tatarskii, V., 2009. Impact of Cloud Microphysics on the Development of Trailing Stratiform Precipitation in a Simulated Squall Line: Comparison of One- and Two-Moment Schemes. *Monthly Weather Review*. 137, 991-1007.
