# Supplementary material for: Frequent haze events associated with transport and stagnation over the corridor between North China Plain and Yangtze River Delta
Source: Copernicus journal article supplement (doi:10.5194/egusphere-2023-1871), 2023-10-09
Supplement: Supplementary file [file egusphere-2023-1871-AC1-supplement.pdf]

Referee #1:

Reply: We thank the support for the reviewer, and thanks for the helpful comments prior to the ACP Discussion online.
